# Supplementary material for: Growth of Cu particles on a Cu2O truncated octahedron: tuning of the Cu content for efficient glucose sensing
Source: Royal Society of Chemistry journal article supplement (doi:10.1039/c5cp03748d), 2015-01-01
Supplement: c5cp03748d1.pdf [file c5cp03748d1.pdf]

# Supporting Information for

## Growth of Cu particles on Cu<sub>2</sub>O truncated octahedron: tuning of the Cu content for efficient glucose sensing

Gang Wang, Hong Sun, Lu Ding, Gang Zhou, and Zhong-Sheng Wang\*

Department of Chemistry, Laboratory of Advanced Materials, iChEM (Collaborative Innovation Center of Chemistry for Energy Materials), Fudan University, 2205

Songhu Road, Shanghai 200438, P. R. China.

\* Corresponding author: zs.wang@fudan.edu.cn

Table S1. Molar ratio of Cu/Cu<sub>2</sub>O in the hybrid structure

| Sample                    | n(Cu)/n(Cu <sub>2</sub> O) |
|---------------------------|----------------------------|
| Cu-Cu <sub>2</sub> O(60)  | 0.22                       |
| Cu-Cu <sub>2</sub> O(80)  | 0.44                       |
| Cu-Cu <sub>2</sub> O(100) | 0.83                       |
| Cu-Cu <sub>2</sub> O(120) | 3.38                       |

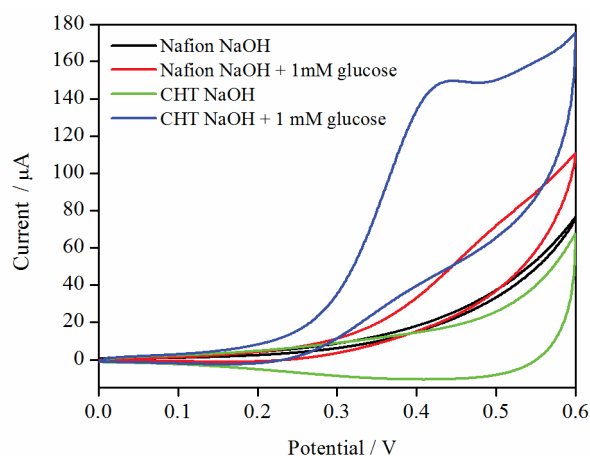

**Fig. S1.** CV curves of Nafion/Cu-Cu<sub>2</sub>O(100)/FTO and CHT/Cu-Cu<sub>2</sub>O(100)/FTO in 0.1 M NaOH with 0 mM glucose and 1 mM glucose.

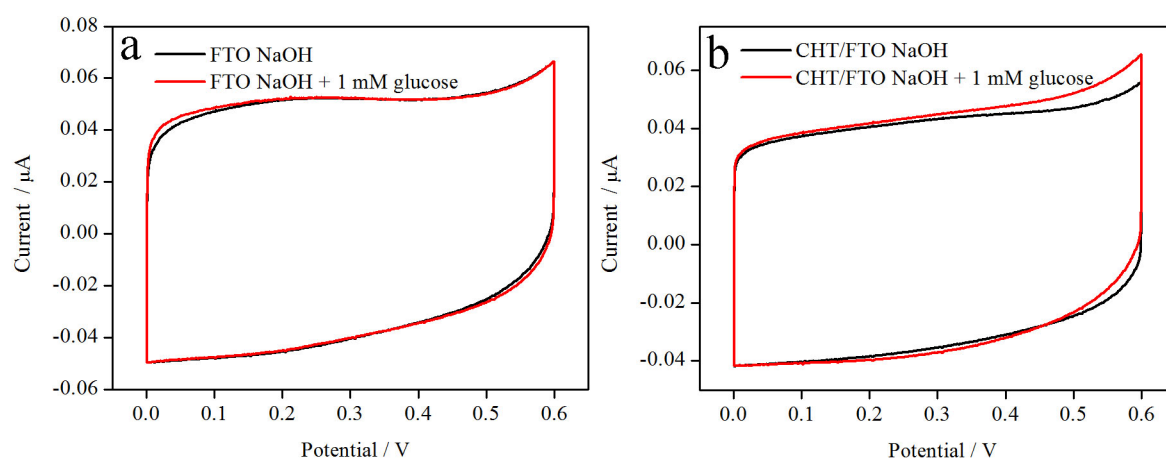

**Fig. S2.** CV curves of (a) bare FTO and (b) CHT/FTO in 0.1 M NaOH in the absence (black line) and presence (red line) of 1 mM glucose.

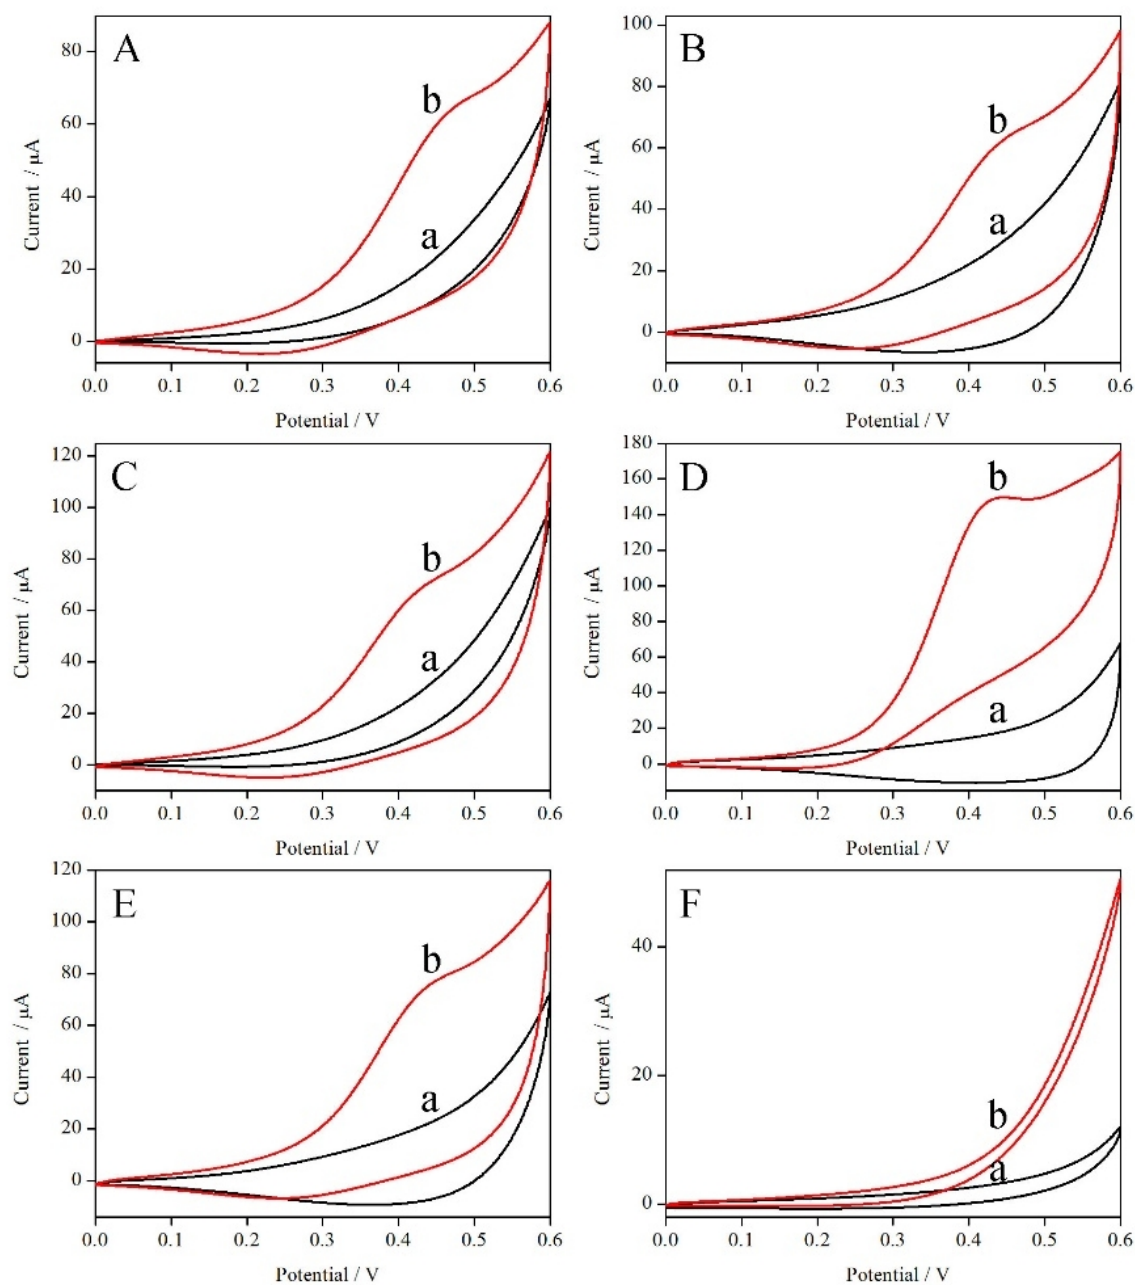

**Fig. S3.** CV curves of (A) CHT/Cu<sub>2</sub>O/FTO, (B) CHT/Cu-Cu<sub>2</sub>O(60)/FTO, (C) CHT/Cu-Cu<sub>2</sub>O(80)/FTO, (D) CHT/Cu-Cu<sub>2</sub>O(100)/FTO, (E) CHT/Cu-Cu<sub>2</sub>O(120)/FTO, and (F) CHT/Cu/FTO at a scan rate of 50 mV s<sup>-1</sup> in 0.1 M NaOH solution without (curve a, black line) and with (curve b, red line) 1 mM glucose.

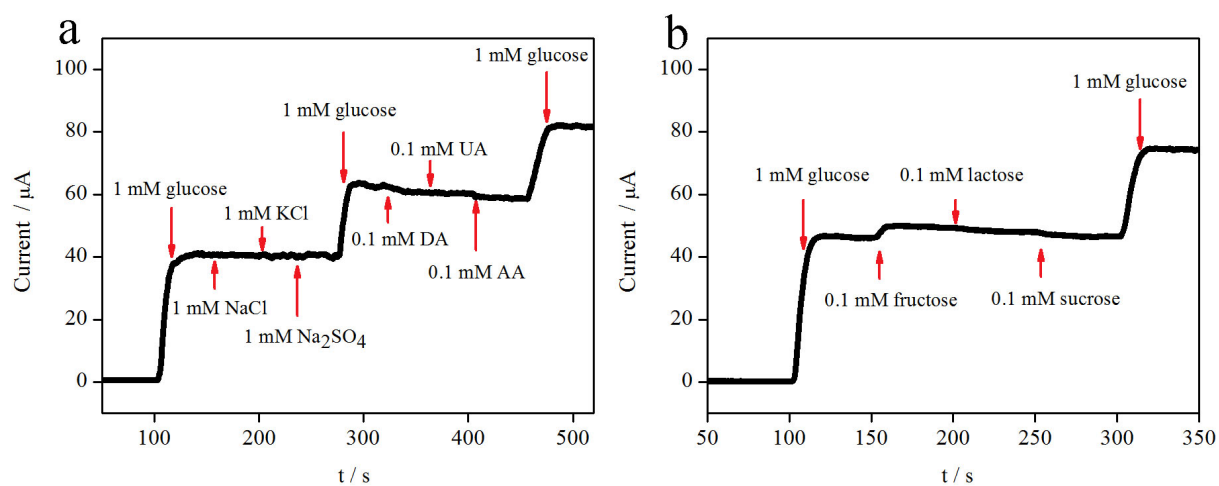

**Fig. S4.** Current responses to glucose followed by addition of various interferents at 0.40 V.

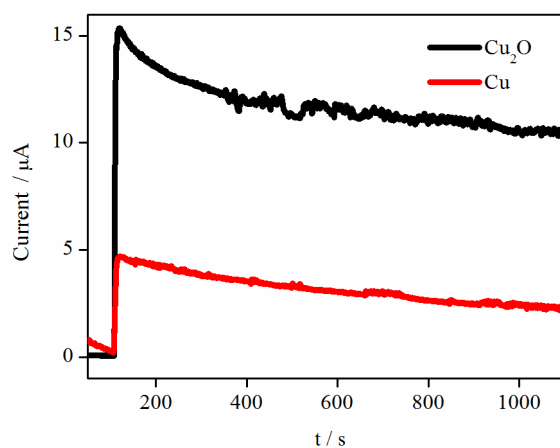

**Fig. S5.** The amperometric response of CHT/Cu<sub>2</sub>O/FTO and CHT/Cu/FTO to 1 mM glucose during 1000 s.
